# Supplementary material for: Engineering a high-capacity and long-cycle-life magnesium/lithium hybrid-ion battery using a lamellar SnSe2/SnSe/SnO2 cathode
Source: Royal Society of Chemistry journal article supplement (doi:10.1039/d4cc04735d), 2024-01-01
Supplement: d4cc04735d1.pdf [file d4cc04735d1.pdf]

Electronic Supplementary Information (ESI) for Chemical Communications. This journal is (c) The Royal Society of Chemistry 2024.  
Electronic Supplementary Information (ESI)

## **Engineering a high-capacity and long-cycle life magnesium/lithium hybrid-ion battery using lamellar SnSe<sub>2</sub>/SnSe/SnO<sub>2</sub> cathode**

Jiamin Liu<sup>a</sup>, Ting Zhou<sup>a</sup>, Yun Shen<sup>b</sup>, Peng Zuo<sup>b</sup>, Hui Qiu<sup>b</sup>, Yajun Zhu<sup>a,c</sup> and Jinyun Liu<sup>a,\*</sup>

### **Experimental Section**

#### ***Preparation of hierarchical SnO<sub>2</sub> precursor***

Typically, 6.846 g sucrose and 3.506 g SnCl<sub>4</sub>·5H<sub>2</sub>O were dissolved in 40 mL deionized water, and the clear solution was poured into a 50 mL Teflon-lined autoclave and maintained at 180 °C for 6 h. After cooling down naturally to room temperature, the resulting brown precipitate was washed with deionized water and ethanol for several times, and dried at 60 °C. The sample was placed in a ceramic boat and calcined at 500 °C for 1 h with a ramping rate of 1 °C min<sup>-1</sup> under air atmosphere.

#### ***Preparation of lamellar SnSe<sub>2</sub>/SnSe/SnO<sub>2</sub>***

1.5 g of SnO<sub>2</sub> and 7.5 g of selenium powders were separately placed in two ceramic boats. The one containing selenium powders were placed at the upstream side and another at the center of the tube furnace. Then it was annealed at 500 °C for 2 h in an Ar/H<sub>2</sub> atmosphere.

#### ***Characterizations***

The X-ray Powder diffraction (XRD) was performed using a Hitachi Smart Lab 9 KW (Japan) with Cu-K $\alpha$  radiation over the 2 $\theta$  range of 10-80°. The morphology of the composite was characterized by scanning electron microscopy (FESEM, Hitachi Regulus 8100, operated at 5 kV), and the distribution of elements was analyzed by energy dispersive spectroscopy (EDS). The microstructure and crystallinity of the sample was obtained by using transmission electron microscope (TEM, HT-7700) and

high-resolution TEM (HRTEM, JEM-2100F microscope, operated at 200 kV) images. Elemental (Sn, Se, O, and C) valence states were characterized by X-ray photoelectron spectroscopy (XPS, EscalAB 250). Raman spectra were obtained by using Raman spectroscopy (Renishaw in Via). And the Brunauer Emmett Teller (BET) specific surface area of the sample was measured by a surface area tester (ASAP Micromeritics Tristar 2460).

### ***Electrochemical measurements***

The as-prepared SnSe<sub>2</sub>/SnSe/SnO<sub>2</sub> (80 wt%), acetylene black (10 wt%) and polyvinylidene fluoride (6.54% PVDF, 10 wt%) were dissolved in N-methyl pyrrolidinone (NMP). The slurry was uniformly spread on copper foil and dried under vacuum for 24 h at 80°C. The electrode sheet with an area of 2 cm<sup>2</sup> was obtained by a punch. And the electrode has a mass load of about 0.8-1.3 mg cm<sup>-2</sup> of the active materials. The coin cells (CR2032) were assembled with SnSe<sub>2</sub>/SnSe/SnO<sub>2</sub> as the cathode, polished Mg foil as anode and glass fiber film (Whatman, GF/F) separator in glovebox. An 0.4 mol L<sup>-1</sup> all-phenyl composite (APC) with 0.4 mol L<sup>-1</sup> lithium chloride (LiCl) was prepared as electrolyte for MLHBs. The galvanostatic charge-discharge was tested on a Neware battery test system. Cyclic voltammetry (CV) curves and electrochemical impedance spectroscopy (EIS) spectra were measured by using an electrochemical workstation (CHI 660E).

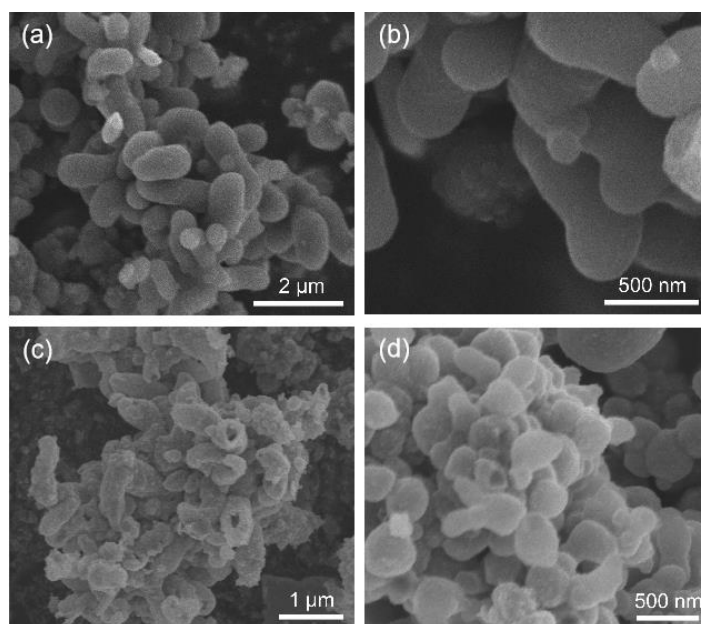

**Fig. S1** SEM images of (a, b) hierarchical SnO<sub>2</sub>@C and (c, d) SnO<sub>2</sub>.

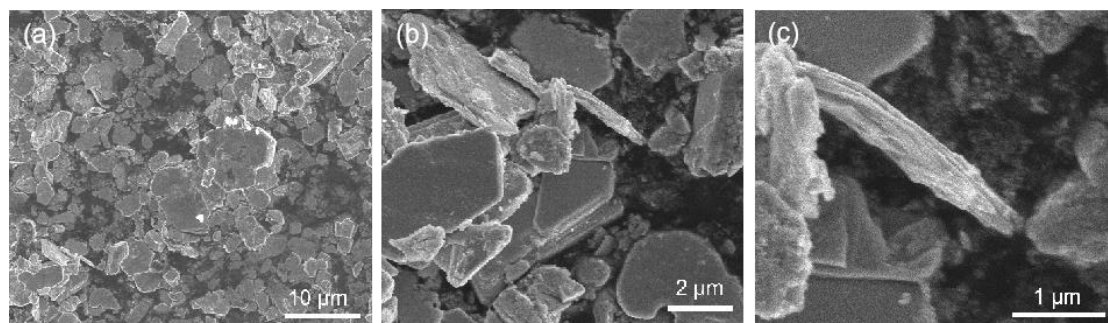

**Fig. S2** (a-c) SEM images of SnSe<sub>2</sub>/SnSe/SnO<sub>2</sub>.

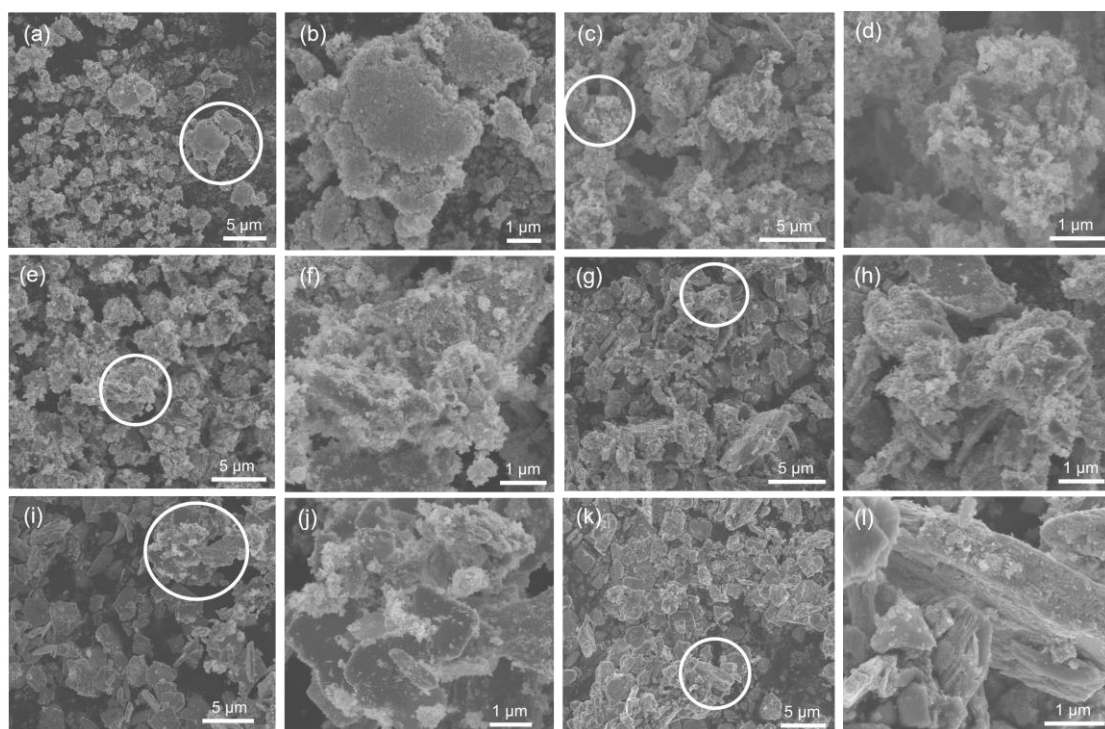

**Fig. S3** SEM images of samples after selenization for (a, b) 10, (c, d) 20, (e, f) 30, (g, h) 40, (i, j) 60 and (k, l) 90 min.

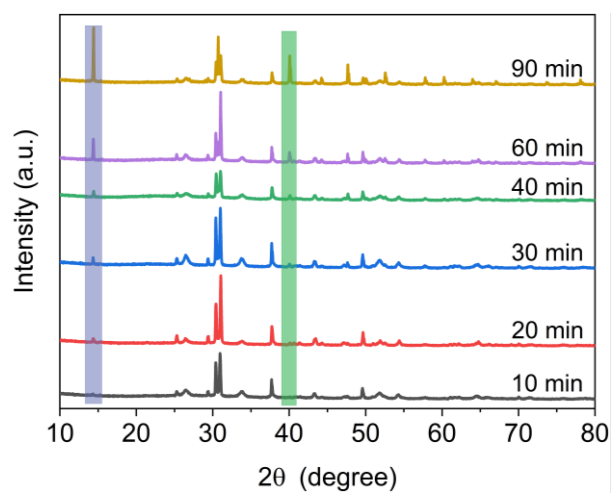

**Fig. S4** XRD patterns of the samples after different selenization times.

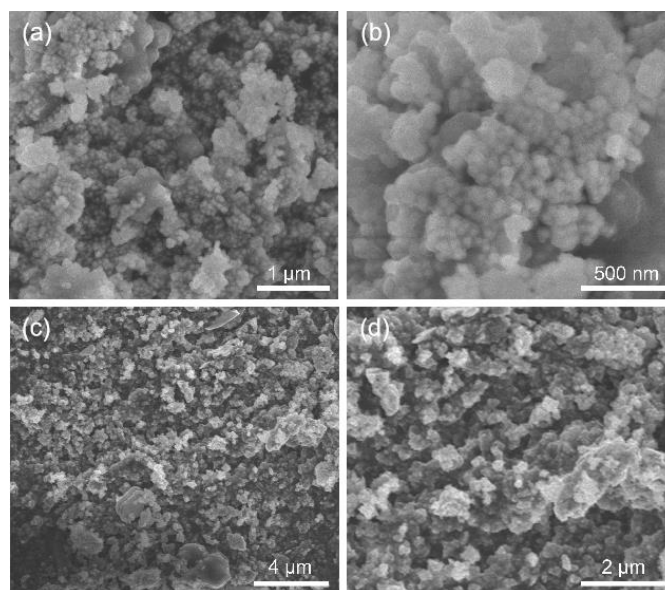

**Fig. S5** SEM images of (a, b) SnO<sub>2</sub> particles and (c, d) as-formed SnSe<sub>2</sub>/SnSe/SnO<sub>2</sub>.

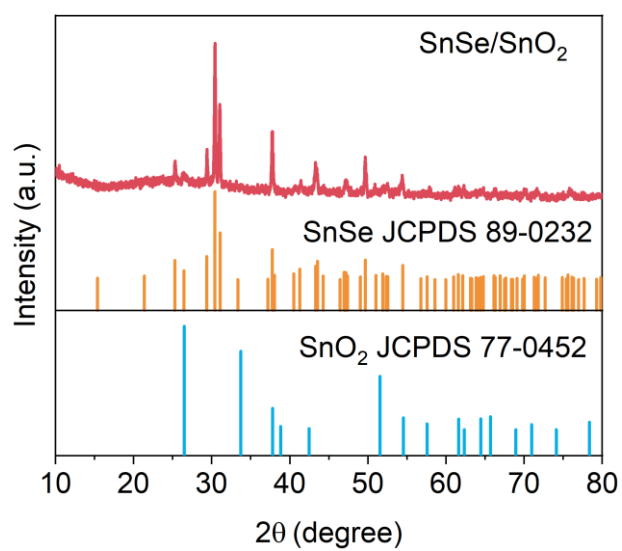

**Fig. S6** XRD patterns of the granular SnSe/SnO<sub>2</sub>.

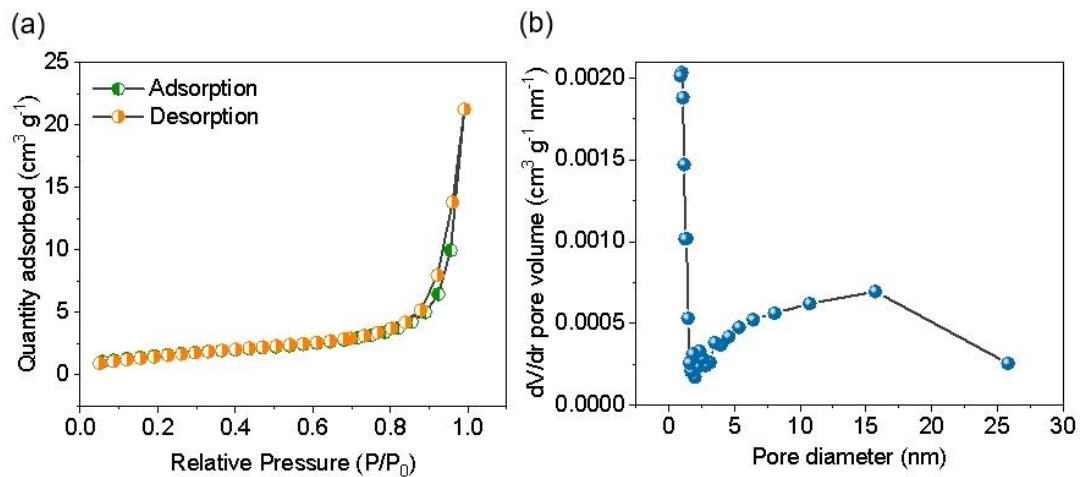

**Fig. S7** (a)  $\text{N}_2$  adsorption-desorption isotherms and (b) pore-size distribution of  $\text{SnSe}_2/\text{SnSe}/\text{SnO}_2$ .

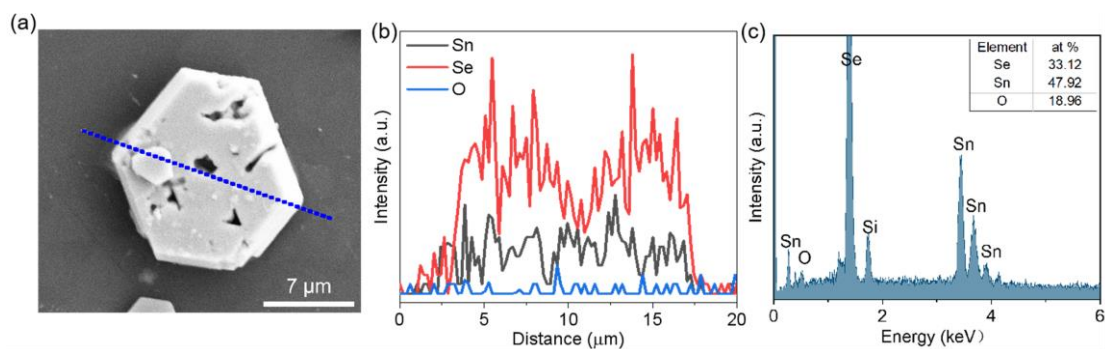

**Fig. S8** (a) SEM image, (b) line-scanning curves and (c) EDS spectrum of  $\text{SnSe}_2/\text{SnSe}/\text{SnO}_2$ .

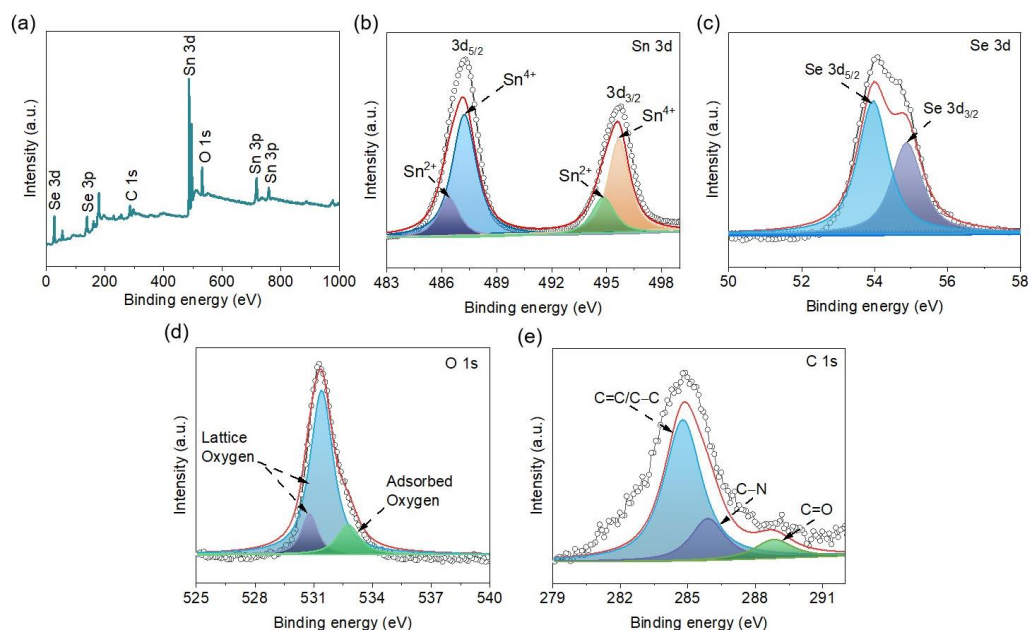

**Fig. S9** (a) Survey spectrum of SnSe<sub>2</sub>/SnSe/SnO<sub>2</sub>. XPS spectra of SnSe<sub>2</sub>/SnSe/SnO<sub>2</sub>: (b) Sn 3d, (c) Se 3d, (d) O 1s and (e) C 1s.

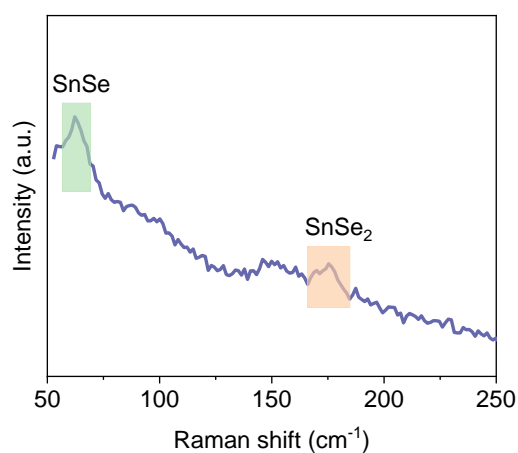

**Fig. S10** Raman spectrum of SnSe<sub>2</sub>/SnSe/SnO<sub>2</sub>.

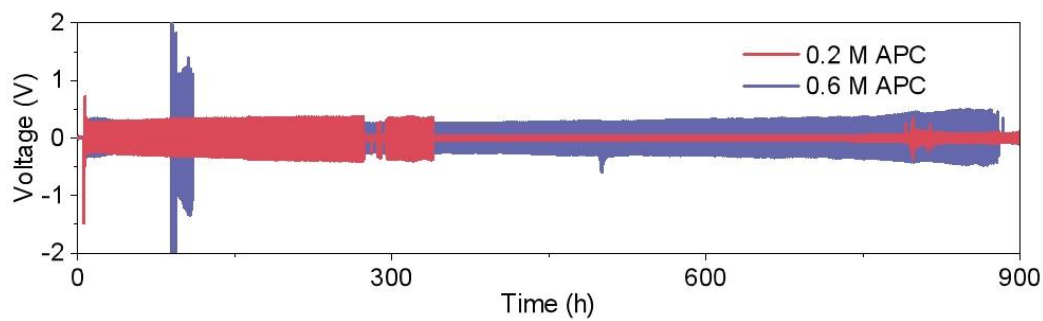

**Fig. S11** Long-term Mg stripping/plating of the Mg|Mg cells using different concentrations of APC at 0.4 mA cm<sup>-2</sup>.

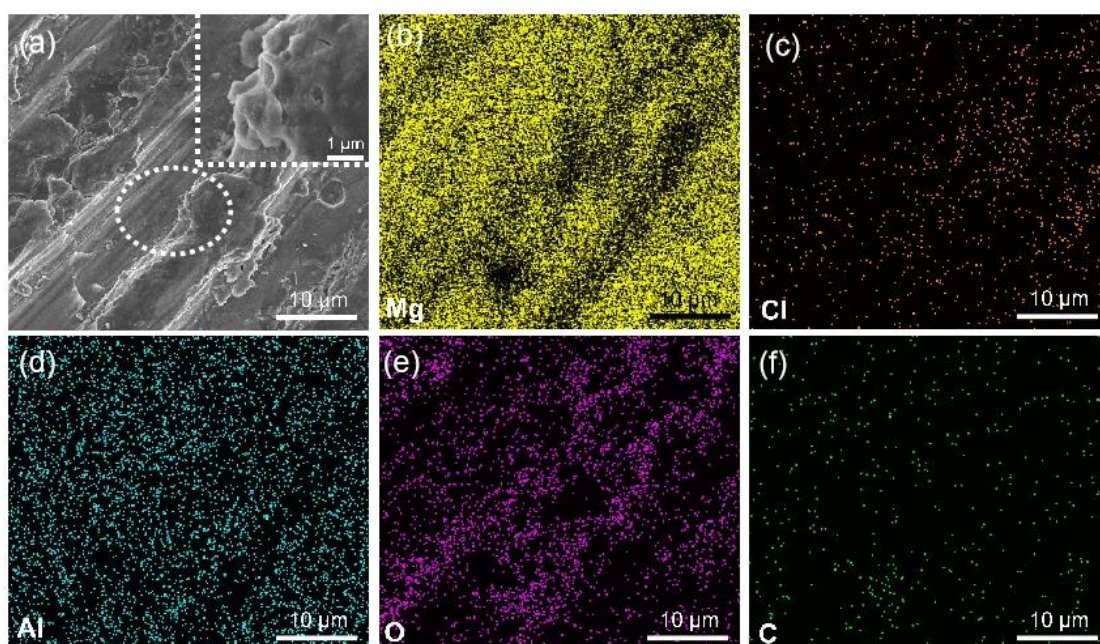

**Fig. S12** (a) SEM image of Mg anode after cycling in the APC-0.2 M LiCl electrolyte and corresponding mapping images of (b) Mg, (c) Cl, (d) Al, (e) O and (f) C.

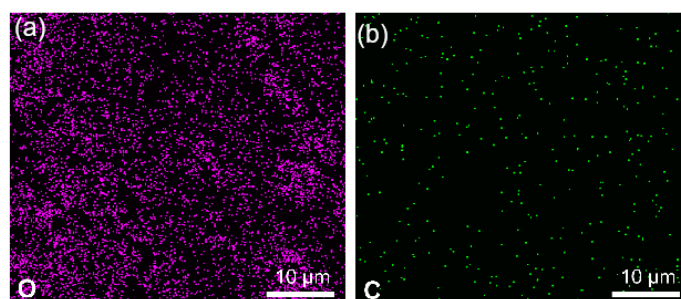

**Fig. S13** Elemental mapping images of Mg anode after cycling in the APC-0.4 M LiCl electrolyte: (a) O and (b) C.



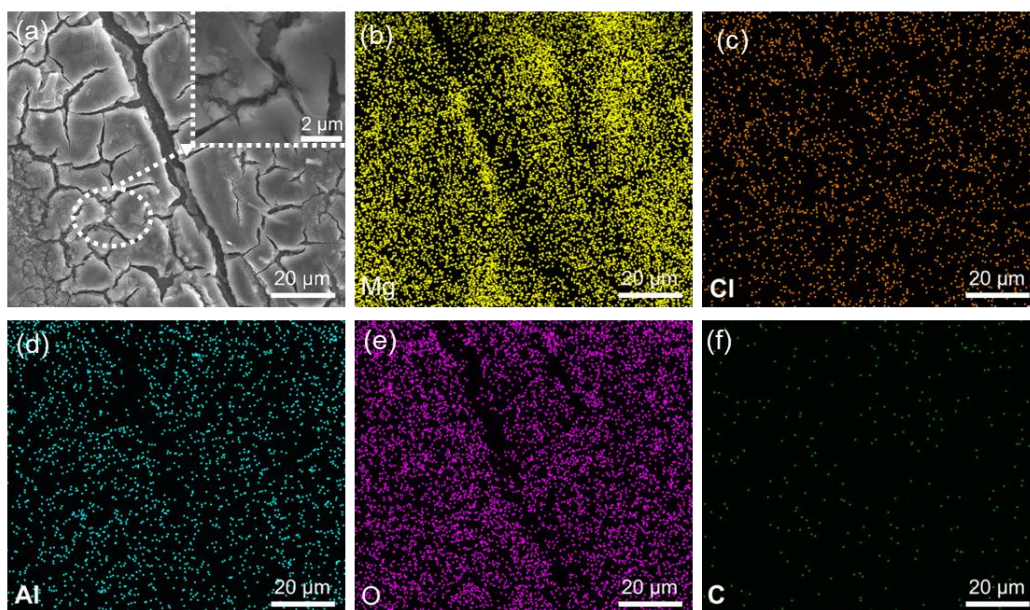

**Fig. S14** (a) SEM image of Mg anode after cycling in the APC-0.6 M LiCl electrolyte and corresponding mapping images of (b) Mg, (c) Cl, (d) Al, (e) O and (f) C.

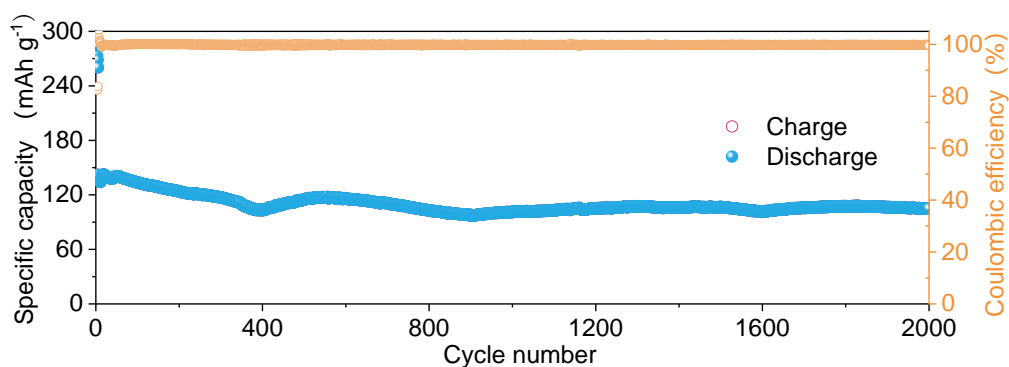

**Fig. S15** Cycling performance of MLHB with SnSe<sub>2</sub>/SnSe/SnO<sub>2</sub>@C cathode working with APC-0.4 M LiCl electrolyte at 1.0 A g<sup>-1</sup>.

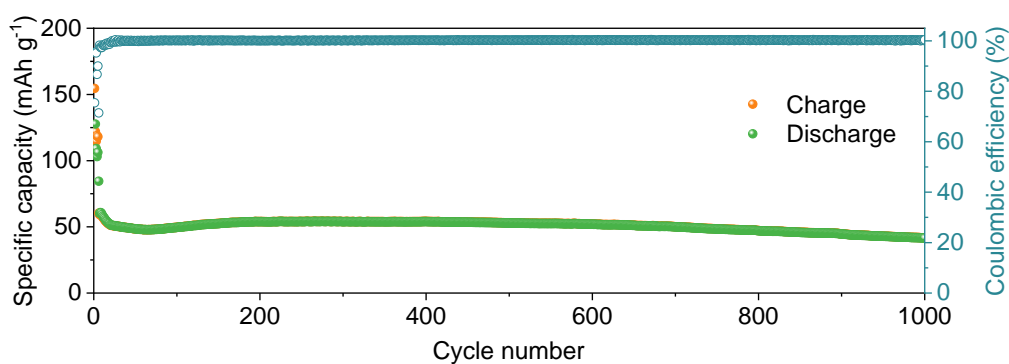

**Fig. S16** Cycling performance of MLHB with SnSe/SnO<sub>2</sub> particles as cathode working with APC-0.4 M LiCl electrolyte at 1.0 A g<sup>-1</sup>.

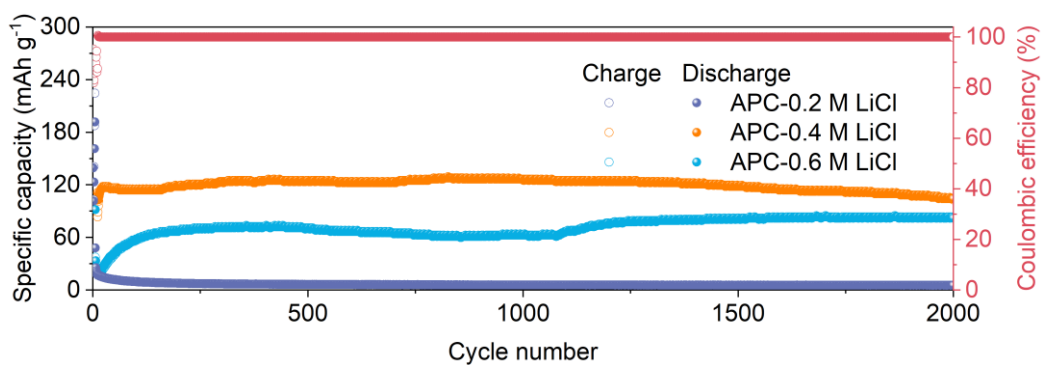

**Fig. S17** Cycling performance of the MLHBs with lamellar SnSe<sub>2</sub>/SnSe/SnO<sub>2</sub> as cathode and APC-x LiCl (x=0.2, 0.4 and 0.6 M) as electrolytes at 5.0 A g<sup>-1</sup>.

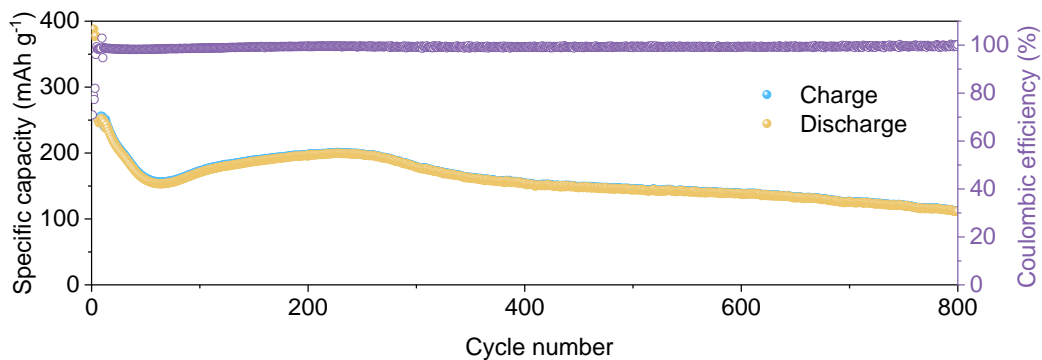

**Fig. S18** Cycling performance of MLHB with SnSe<sub>2</sub>/SnSe/SnO<sub>2</sub> cathode working with APC-0.4 M LiCl at 1.0 A g<sup>-1</sup> under 50 °C. Before the cell was cycled at 1.0 A g<sup>-1</sup>, a pre-activation for 5 cycles at 0.2 A g<sup>-1</sup> was performed.

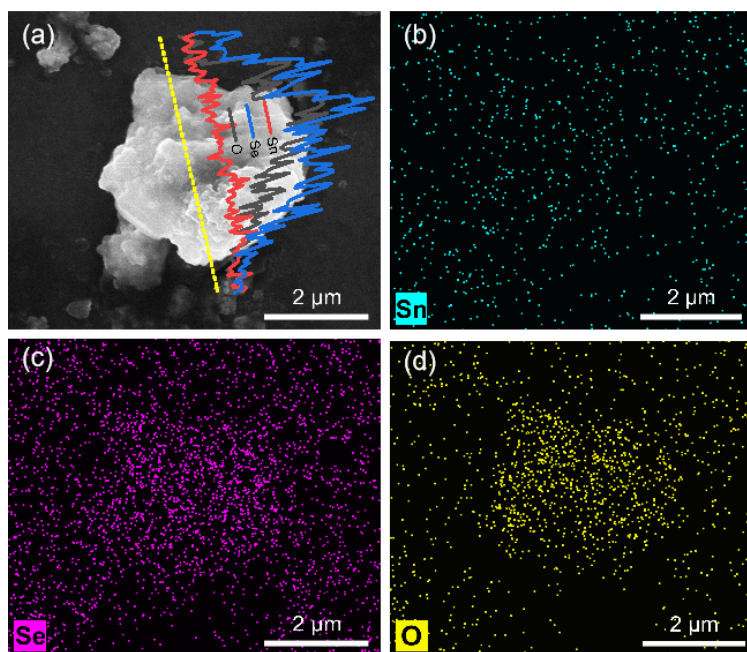

**Fig. S19** (a) SEM image and line-scanning curves. (b) Mapping images of SnSe<sub>2</sub>/SnSe/SnO<sub>2</sub> after cycling 500 times at 1.0 A g<sup>-1</sup>.

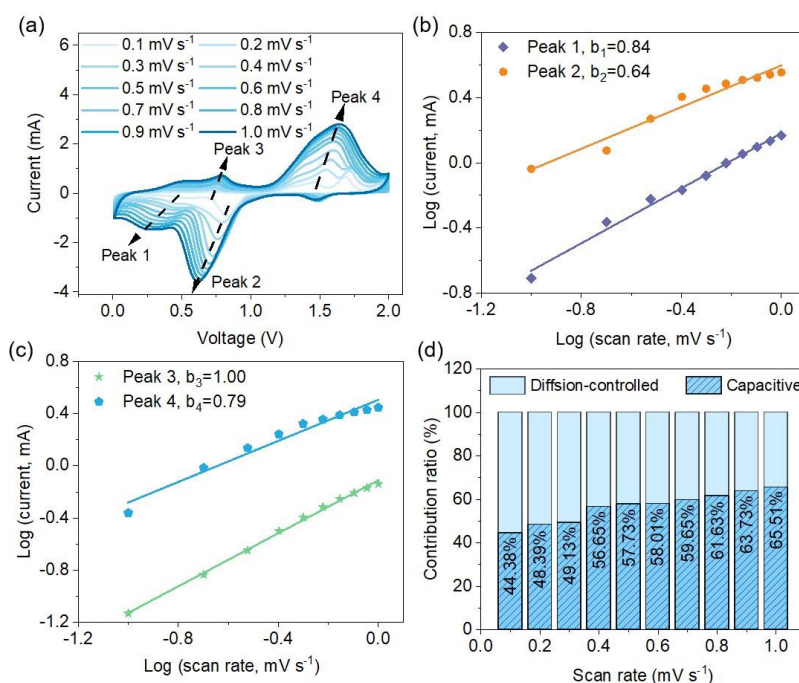

**Fig. S20** (a) CV curves of the SnSe<sub>2</sub>/SnSe/SnO<sub>2</sub>-based MLHBs at scanning rates from 0.1 to 1.0 mV s<sup>-1</sup>. (b, c) The log(i) versus log(v) plots. (d) The contribution ratios of capacitive and diffusion-controlled processes.

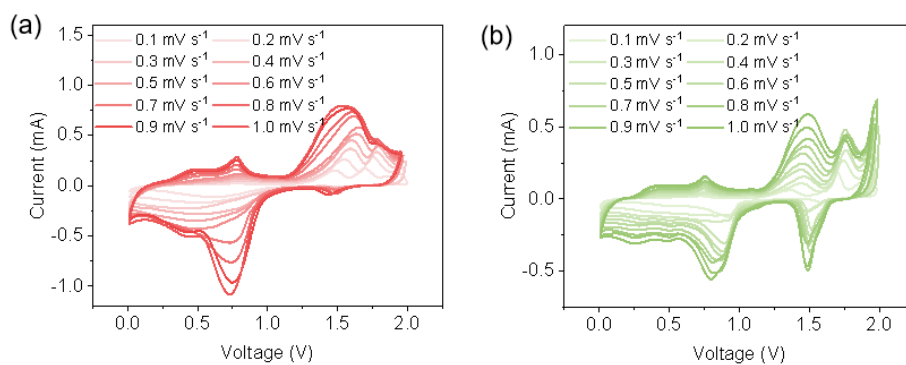

**Fig. S21** CV curves of MLHBs using (a) APC-0.2 M LiCl and (b) APC-0.6 M LiCl electrolytes under scanning rates from 0.1 to 1.0  $\text{mV s}^{-1}$ .

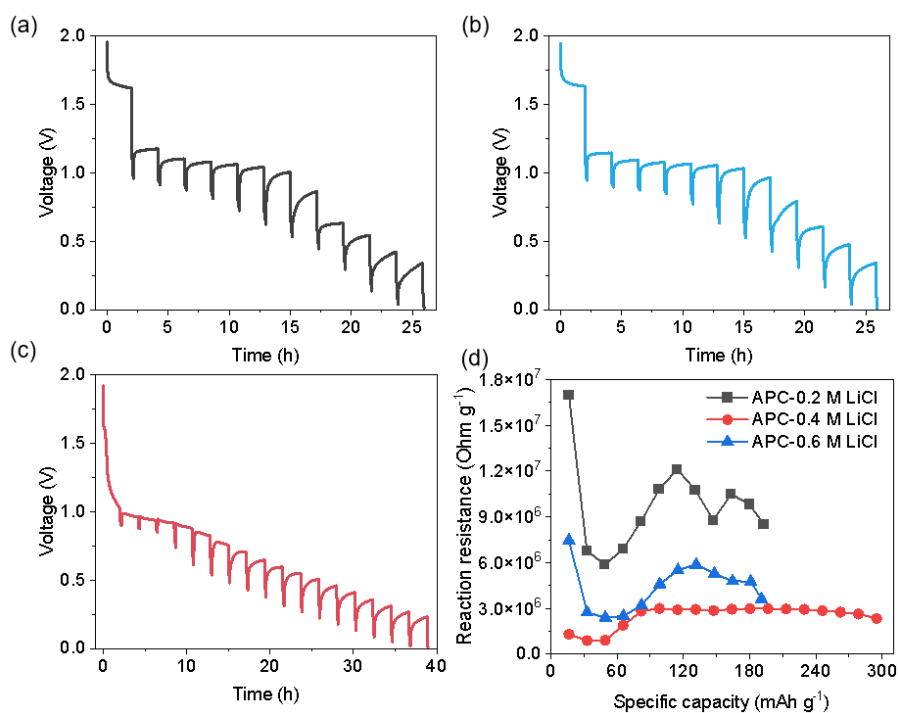

**Fig. S22** GITT time-potential distributions of batteries with (a) APC-0.2 M LiCl, (b) APC-0.6 M LiCl and (c) APC-0.4 M LiCl as electrolytes. (d) Reaction resistances of batteries with APC-0.2 M LiCl, APC-0.6 M LiCl and APC-0.4 M LiCl as electrolytes during discharge.

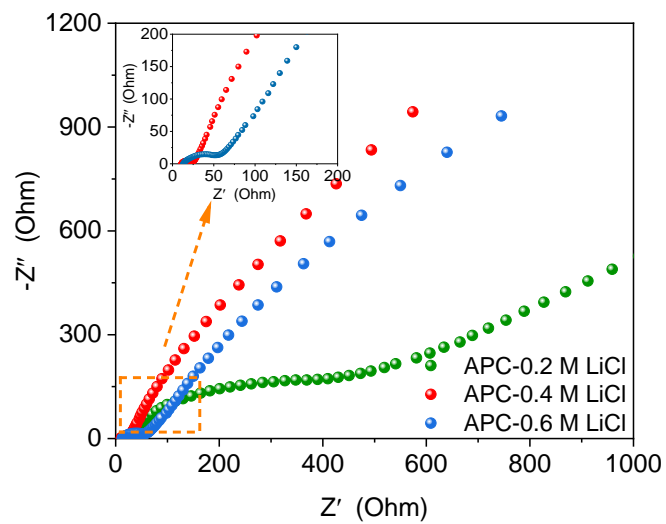

**Fig. S23** EIS spectra of MLHBs with APC-0.2 M LiCl, APC-0.4 M LiCl and APC-0.6 M LiCl as electrolytes after 10 cycles at  $0.2 \text{ A g}^{-1}$ .

**Table S1** Comparison on performance of MLHB with some other cathode materials and electrolytes.

| Cathode materials                                                                                | Electrolytes                      | Current density (A g <sup>-1</sup> ) | Cycle number | Capacity (mAh g <sup>-1</sup> ) | Ref.      |
|--------------------------------------------------------------------------------------------------|-----------------------------------|--------------------------------------|--------------|---------------------------------|-----------|
| Lamellar SnSe <sub>2</sub> /SnSe/SnO <sub>2</sub>                                                | 0.4 M APC-0.4 M LiCl              | 0.1                                  | 100          | 551                             | This work |
|                                                                                                  |                                   | 1.0                                  | 2000         | 233                             |           |
| Mn <sub>3</sub> O <sub>4</sub> nanoparticles                                                     | 0.4 M APC                         | 0.0154                               | 30           | 220                             | [1]       |
| Octahedral shape of Cu <sub>2</sub> S@C                                                          | 0.4 M APC-1.0 M LiCl              | 0.05                                 | 50           | 155                             | [2]       |
| Lamellar Cu <sub>2</sub> Se/CoSe                                                                 | 0.4 M APC-0.8 M LiCl              | 0.1                                  | 200          | 140                             | [3]       |
| Flower-like CoS                                                                                  | 0.4 M APC-0.8 M LiCl              | 0.1                                  | 80           | 457                             | [4]       |
| VO <sub>2</sub> nanoflakes                                                                       | 0.25 M APC-1.0 M LiCl             | 0.1                                  | 100          | 154.9                           | [5]       |
| Amorphism dilithium salt of poly(2,5-dihydroxy-p-benzoquinonyl sulfide) (Li <sub>2</sub> PDHBQS) | 1.0 M MgCl <sub>2</sub> -LiCl/THF | 0.5                                  | 500          | 166                             | [6]       |
| VS <sub>4</sub> nanodendrites                                                                    | 0.4 M APC-0.4 M LiCl              | 1.0                                  | 1500         | 110                             | [7]       |
| TiO <sub>2-x</sub> microspheres                                                                  | 0.4 M APC-0.4 M LiCl              | 1.68                                 | 2500         | 91                              | [8]       |

## References

- [1] L. Wang, P. E. Vullum, K. Asheim, X. H. Wang, A. M. Svensson and F. Vullum-Bruer, *Nano Energy*, 2018, **48**, 227-237.
- [2] W. Q. Wang, Y. Y. Yang, Y. N. Li, J. J. Zhou, J. Yang and J. L. Wang, *J. Power Sources*, 2020, **445**, 227325-227337.
- [3] Z. H. Gao, R. S. Shi, Y. P. Zhao, J. G. Zhang, J. C. Liu, Y. F. Zhu, Y. N. Liu, J. Wang and L. Q. Li, *Electrochim. Acta*, 2023, **469**, 143298.
- [4] X. Zhang, H. Xu, J. S. Yang, Y. X. Zhu, C. Lu, K. Zhang, G. M. Weng and J. X. Zou, *Chem. Nano Mat.*, 2021, **7**, 641-650.
- [5] C. Y. Pei, F. Y. Xiong, J. Z. Sheng, Y. M. Yin, S. S. Tan, D. D. Wang, C. H. Han, Q. Y. An and L. Q. Mai, *ACS Appl. Mater. Interfaces*, 2017, **9**, 17060-17066.
- [6] Y. Han, G. F. Li, Z. J. Hu, F. Wang, J. Chu, L. Huang, T. T. Shi, H. Zhan and Z. P. Song, *Energy Storage Mater.*, 2022, **46**, 300-312.
- [7] Y. R. Wang, C. X. Wang, X. Yi, Y. Hu, L. Wang, L. B. Ma, G. Y. Zhu, T. Chen and Z. Jin, *Energy Storage Mater.*, 2019, **23**, 741-748.
- [8] T. Mu, J. G. Zhang, R. Shi, Y. F. Zhu, J. L. Zhu, Y. N. Liu, Y. Zhang and L. Q. Li, *Chem. Commun.*, 2020, **56**, 8039-8042.
